# Supplementary material for: An indirect competitive fluorescence assay for ochratoxin A based on molecular beacon
Source: Royal Society of Chemistry journal article supplement (doi:10.1039/c5ra23966d), 2016-01-01
Supplement: c5ra23966d1.pdf [file c5ra23966d1.pdf]

## Supplementary Information

### An indirect competitive fluorescence assay for ochratoxin A based on molecular beacon

Xiaowen Dou<sup>a</sup>, Xianfeng Chu<sup>a</sup>, Weijun Kong<sup>a</sup>, Jiaoyang Luo<sup>a</sup>, Meihua Yang<sup>\*a, b</sup>

<sup>a</sup> Institute of Medicinal Plant Development, Chinese Academy of Medical Sciences & Peking Union Medical College, Beijing 100193, China

<sup>b</sup> Hainan Branch Institute of Medicinal Plant Development, Chinese Academy of Medical Sciences & Peking Union Medical College, Wanning 571533, Hainan, China

\*Corresponding author: E-mail: yangmeihua15@hotmail.com; Fax: +86 10 62896288; Tel: +86 10 5783327

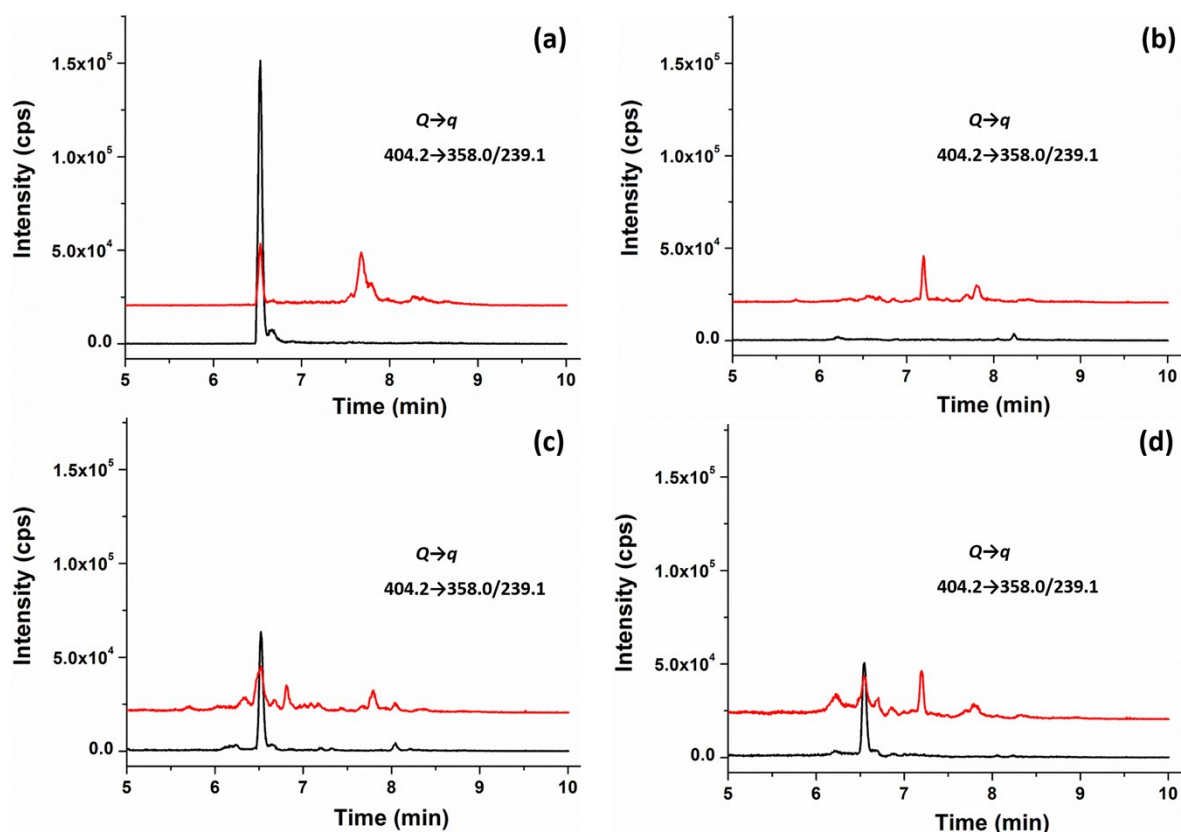

**Fig. S1** LC-MS/MS MRM chromatograms of extracted ion transition (404.2/358.0 and 404.2/239.1 both for qualification) from OTA standard solution at 2.5 ng·mL<sup>-1</sup>(a), Blank extract (b), the positive malt samples of S1 (c) and S2 (d).
